# Supplementary material for: Prognostic Significance of Blood-Based Multi-cancer Detection in Plasma Cell-Free DNA
Source: PubMed Central journal article supplement — Clin Cancer Res. 2021 Jun 4;27(15):4221–9. doi: 10.1158/1078-0432.CCR-21-0417 (PMC9401481; doi:10.1158/1078-0432.ccr-21-0417), 2021-06-04
Supplement: ccr-21-0417_supplementary_table_2_suppst2.pdf [file ccr-21-0417_supplementary_table_2_suppst2.pdf]

**Supplementary Table 2.**

List of cancer types, number of deaths per cancer type, and median, minimal, and maximal overall survival (OS, month) for each cancer type.

| Cancer Type          | Total (N) | Death (n) | OS Median | OS Min | OS Max |
|----------------------|-----------|-----------|-----------|--------|--------|
| Anus                 | 18        | 2         | 23.2      | 11.4   | 36.3   |
| Bladder              | 14        | 5         | 12.2      | 1.2    | 35.9   |
| Breast               | 346       | 17        | 24.9      | 0.5    | 38.4   |
| Cervix               | 17        | 1         | 23.9      | 10.9   | 38     |
| Colon/Rectum         | 172       | 41        | 23.9      | 0.7    | 37.6   |
| Esophagus            | 70        | 32        | 17.1      | 2.8    | 34.9   |
| Gallbladder          | 13        | 5         | 22.8      | 0.8    | 25.4   |
| Head and Neck        | 83        | 16        | 23.3      | 1.8    | 36     |
| Kidney               | 71        | 10        | 23.3      | 1      | 38.2   |
| Liver/Bile-duct      | 36        | 19        | 14.6      | 0.6    | 34.9   |
| Lung                 | 367       | 186       | 18        | 0.2    | 38.4   |
| Lymphoid Leukemia    | 57        | 6         | 23.8      | 0.7    | 37.7   |
| Lymphoma             | 156       | 20        | 24.2      | 0.5    | 37.9   |
| Melanoma             | 8         | 2         | 25        | 2.4    | 36.8   |
| Myeloid Neoplasm     | 5         | 0         | 24.4      | 12.2   | 35.3   |
| Other <sup>a</sup>   | 43        | 14        | 23.2      | 1.6    | 37.4   |
| Ovary                | 54        | 9         | 23        | 3      | 28.3   |
| Pancreas             | 121       | 88        | 9.1       | 0.5    | 37.9   |
| Plasma Cell Neoplasm | 46        | 9         | 22.7      | 1.3    | 36.3   |
| Prostate             | 259       | 7         | 25.3      | 0.6    | 39.9   |
| Sarcoma              | 20        | 3         | 24.7      | 1.9    | 36.2   |
| Stomach              | 24        | 15        | 13.2      | 0.4    | 25     |
| Thyroid              | 5         | 0         | 24.2      | 23.4   | 25.7   |
| Urothelial Tract     | 5         | 0         | 28.3      | 23.7   | 36.6   |
| Uterus               | 119       | 9         | 25        | 4.4    | 39.2   |

<sup>a</sup>Other includes brain, mesothelioma, orbit, penis, pleura, skin cancer (not basal cell carcinoma, squamous cell carcinoma, or melanoma), small intestine, testis, thymus, vagina, vulva, and unspecified.
