# Supplementary material for: Prognostic Significance of Blood-Based Multi-cancer Detection in Plasma Cell-Free DNA
Source: PubMed Central journal article supplement — Clin Cancer Res. 2021 Jun 4;27(15):4221–9. doi: 10.1158/1078-0432.CCR-21-0417 (PMC9401481; doi:10.1158/1078-0432.ccr-21-0417), 2021-06-04
Supplement: ccr-21-0417_supplementary_table_t3_suppst3.pdf [file ccr-21-0417_supplementary_table_t3_suppst3.pdf]

**Supplementary Table 3.**

MCED test sensitivity in alive or dead participants of cancer, listed by cancer type and clinical stage. Hazard ratio (HR) with 95% confidence interval and p-value across cancer types in all stages, stages I-III, and stage IV, for those with events in both MCED test detected and not detected groups were also indicated.

| Cancers                 | Alive |          |                 | Dead  |          |                 | HR (95% CI)<br>Detected vs.<br>Not Detected | p-value |
|-------------------------|-------|----------|-----------------|-------|----------|-----------------|---------------------------------------------|---------|
|                         | Total | Detected | Sensitivity (%) | Total | Detected | Sensitivity (%) |                                             |         |
| <b>Anus All</b>         | 16    | 11       | 69              | 2     | 2        | 100             | NA                                          | NA      |
| Stage I                 | 4     | 2        | 50              | NA    | NA       | NA              | NA                                          | NA      |
| Stage II                | 7     | 4        | 57              | NA    | NA       | NA              | NA                                          | NA      |
| Stage III               | 5     | 5        | 100             | 1     | 1        | 100             | NA                                          | NA      |
| Stage IV                | NA    | NA       | NA              | 1     | 1        | 100             | NA                                          | NA      |
| <b>Bladder All</b>      | 9     | 5        | 56              | 5     | 4        | 80              | 2.22 (0.25-19.99)                           | 0.48    |
| Stage I                 | 4     | 2        | 50              | NA    | NA       | NA              | NA                                          | NA      |
| Stage II                | 4     | 3        | 75              | 1     | 1        | 100             | NA                                          | NA      |
| Stage III               | 1     | 0        | 0               | 3     | 3        | 100             | NA                                          | NA      |
| Stage IV                | NA    | NA       | NA              | 1     | 0        | 0               | NA                                          | NA      |
| <b>Breast All</b>       | 329   | 108      | 33              | 17    | 14       | 82              | 9.85 (2.83-34.33)                           | < 0.001 |
| Stage I                 | 140   | 6        | 4               | 2     | 0        | 0               | 8.57 (2.39-30.74)                           | < 0.001 |
| Stage II                | 147   | 63       | 43              | 8     | 7        | 88              |                                             |         |
| Stage III               | 34    | 31       | 91              | 4     | 4        | 100             |                                             |         |
| Stage IV                | 8     | 8        | 100             | 3     | 3        | 100             | NA                                          | NA      |
| <b>Cervix All</b>       | 16    | 8        | 50              | 1     | 1        | 100             | NA                                          | NA      |
| Stage I                 | 11    | 3        | 27              | NA    | NA       | NA              | NA                                          | NA      |
| Stage II                | 3     | 3        | 100             | NA    | NA       | NA              | NA                                          | NA      |
| Stage III               | 2     | 2        | 100             | 1     | 1        | 100             | NA                                          | NA      |
| <b>Colon/Rectum All</b> | 131   | 96       | 73              | 41    | 38       | 93              | 4.08 (1.26-13.24)                           | 0.019   |
| Stage I                 | 20    | 9        | 45              | 1     | 0        | 0               | 2.17 (0.47-10.09)                           | 0.32    |
| Stage II                | 28    | 19       | 68              | 4     | 4        | 100             |                                             |         |
| Stage III               | 47    | 35       | 74              | 7     | 6        | 86              |                                             |         |
| Stage IV                | 36    | 33       | 92              | 29    | 28       | 97              | 2.26 (0.31-16.62)                           | 0.42    |

|                            |     |    |     |     |     |     |                   |          |
|----------------------------|-----|----|-----|-----|-----|-----|-------------------|----------|
| <b>Esophagus All</b>       | 38  | 28 | 74  | 32  | 31  | 97  | 8.33 (1.13-61.19) | 0.037    |
| Stage I                    | 5   | 0  | 0   | 1   | 1   | 100 | NA                | NA       |
| Stage II                   | 8   | 4  | 50  | 5   | 5   | 100 | NA                | NA       |
| Stage III                  | 14  | 13 | 93  | 10  | 10  | 100 | NA                | NA       |
| Stage IV                   | 11  | 11 | 100 | 16  | 15  | 94  | 0.26 (0.032-2.18) | 0.22     |
| <b>Gallbladder All</b>     | 8   | 6  | 75  | 5   | 3   | 60  | 0.76 (0.126-4.55) | 0.76     |
| Stage I                    | 2   | 1  | 50  | 2   | 0   | 0   | 0.97 (0.13-7.03)  | 0.98     |
| Stage II                   | 1   | 1  | 100 | NA  | NA  | NA  |                   |          |
| Stage III                  | 2   | 1  | 50  | 2   | 2   | 100 |                   |          |
| Stage IV                   | 3   | 3  | 100 | 1   | 1   | 100 | NA                | NA       |
| <b>Head and Neck All</b>   | 67  | 58 | 87  | 16  | 14  | 88  | 1.24 (0.28-5.46)  | 0.78     |
| Stage I                    | 9   | 8  | 89  | NA  | NA  | NA  | 0.77 (0.086-6.88) | 0.81     |
| Stage II                   | 16  | 12 | 75  | 1   | 1   | 100 |                   |          |
| Stage III                  | 17  | 16 | 94  | 4   | 3   | 75  |                   |          |
| Stage IV                   | 25  | 22 | 88  | 11  | 10  | 91  | 1.60 (0.20-12.57) | 0.65     |
| <b>Kidney All</b>          | 61  | 5  | 8   | 10  | 10  | 100 | NA                | NA       |
| Stage I                    | 47  | 0  | 0   | NA  | NA  | NA  | NA                | NA       |
| Stage II                   | 5   | 1  | 20  | NA  | NA  | NA  | NA                | NA       |
| Stage III                  | 5   | 2  | 40  | NA  | NA  | NA  | NA                | NA       |
| Stage IV                   | 4   | 2  | 50  | 10  | 10  | 100 | NA                | NA       |
| <b>Liver/Bile-duct All</b> | 17  | 14 | 82  | 19  | 18  | 95  | 3.42 (0.45-25.87) | 0.23     |
| Stage I                    | 6   | 4  | 67  | NA  | NA  | NA  | 2.62 (0.32-21.09) | 0.37     |
| Stage II                   | 3   | 3  | 100 | 5   | 4   | 80  |                   |          |
| Stage III                  | 5   | 4  | 80  | 4   | 4   | 100 |                   |          |
| Stage IV                   | 3   | 3  | 100 | 10  | 10  | 100 | NA                | NA       |
| <b>Lung All</b>            | 181 | 94 | 52  | 186 | 166 | 89  | 4.88 (3.07-7.77)  | < 0.0001 |
| Stage I                    | 75  | 12 | 16  | 9   | 4   | 44  | 3.77 (2.14-6.63)  | < 0.0001 |
| Stage II                   | 19  | 11 | 58  | 15  | 12  | 80  |                   |          |
| Stage III                  | 50  | 42 | 84  | 53  | 46  | 87  |                   |          |

|                                           |     |     |     |     |     |     |                    |        |
|-------------------------------------------|-----|-----|-----|-----|-----|-----|--------------------|--------|
| Stage IV                                  | 37  | 29  | 78  | 109 | 104 | 95  | 3.13 (1.27-7.68)   | 0.013  |
| <b>Lymphoid Leukemia All (Not Staged)</b> | 51  | 26  | 51  | 6   | 5   | 83  | 3.55 (0.41-30.70)  | 0.25   |
| <b>Lymphoma All</b>                       | 136 | 101 | 74  | 20  | 17  | 85  | 1.87 (0.55-6.39)   | 0.32   |
| Stage I                                   | 22  | 7   | 32  | NA  | NA  | NA  | 1.30 (0.35-4.81)   | 0.7    |
| Stage II                                  | 35  | 29  | 83  | 4   | 3   | 75  |                    |        |
| Stage III                                 | 29  | 23  | 79  | 8   | 6   | 75  |                    |        |
| Stage IV                                  | 50  | 42  | 84  | 8   | 8   | 100 | NA                 | NA     |
| <b>Melanoma All</b>                       | 6   | 2   | 33  | 2   | 2   | 100 | NA                 | NA     |
| Stage I                                   | 3   | 0   | 0   | NA  | NA  | NA  | NA                 | NA     |
| Stage II                                  | 1   | 0   | 0   | NA  | NA  | NA  | NA                 | NA     |
| Stage IV                                  | 2   | 2   | 100 | 2   | 2   | 100 | NA                 | NA     |
| <b>Myeloid Neoplasm All (Not Staged)</b>  | 5   | 0   | 0   | NA  | NA  | NA  | NA                 | NA     |
| <b>Other<sup>a</sup> All</b>              | 29  | 10  | 34  | 14  | 10  | 71  | 3.54 (1.11-11.33)  | 0.033  |
| Stage I                                   | 9   | 3   | 33  | 2   | 1   | 50  | 9.779 (1.218-78.5) | 0.0319 |
| Stage II                                  | 5   | 1   | 20  | 2   | 2   | 100 |                    |        |
| Stage III                                 | 8   | 3   | 38  | 5   | 5   | 100 |                    |        |
| Stage IV                                  | 5   | 3   | 60  | 3   | 2   | 67  | 1.27 (0.11-14.56)  | 0.85   |
| No Stage                                  | 2   | 0   | 0   | 2   | 0   | 0   | NA                 | NA     |
| <b>Ovary All</b>                          | 45  | 34  | 76  | 9   | 9   | 100 | NA                 | NA     |
| Stage I                                   | 5   | 2   | 40  | NA  | NA  | NA  | NA                 | NA     |
| Stage II                                  | 3   | 0   | 0   | NA  | NA  | NA  | NA                 | NA     |
| Stage III                                 | 30  | 26  | 87  | 7   | 7   | 100 | NA                 | NA     |
| Stage IV                                  | 7   | 6   | 86  | 2   | 2   | 100 | NA                 | NA     |
| <b>Pancreas All</b>                       | 33  | 23  | 70  | 88  | 81  | 92  | 2.35 (1.08-5.09)   | 0.031  |
| Stage I                                   | 9   | 5   | 56  | 10  | 7   | 70  | 1.54 (0.64-3.70)   | 0.34   |
| Stage II                                  | 8   | 6   | 75  | 12  | 10  | 83  |                    |        |
| Stage III                                 | 8   | 5   | 62  | 16  | 15  | 94  |                    |        |
| Stage IV                                  | 8   | 7   | 88  | 50  | 49  | 98  | 2.98 (0.41-        | 0.28   |

|                                 |     |    |     |    |    |     |                     |         |
|---------------------------------|-----|----|-----|----|----|-----|---------------------|---------|
|                                 |     |    |     |    |    |     | 21.67)              |         |
| <b>Plasma Cell Neoplasm All</b> | 37  | 29 | 78  | 9  | 6  | 67  | 0.54 (0.14-2.20)    | 0.39    |
| Stage I                         | 12  | 7  | 58  | 2  | 1  | 50  | 0.54 (0.14-2.20)    | 0.39    |
| Stage II                        | 13  | 10 | 77  | 4  | 3  | 75  |                     |         |
| Stage III                       | 12  | 12 | 100 | 3  | 2  | 67  |                     |         |
| <b>Prostate All</b>             | 252 | 20 | 8   | 7  | 6  | 86  | 64.12 (7.71-533.60) | < 0.001 |
| Stage I                         | 54  | 0  | 0   | 1  | 0  | 0   | NA                  | NA      |
| Stage II                        | 158 | 6  | 4   | NA | NA | NA  | NA                  | NA      |
| Stage III                       | 26  | 4  | 15  | NA | NA | NA  | NA                  | NA      |
| Stage IV                        | 14  | 10 | 71  | 6  | 6  | 100 | NA                  | NA      |
| <b>Sarcoma All</b>              | 17  | 5  | 29  | 3  | 2  | 67  | 4.01 (0.36-44.28)   | 0.26    |
| Stage I                         | 3   | 2  | 67  | NA | NA | NA  | NA                  | NA      |
| Stage II                        | 5   | 0  | 0   | NA | NA | NA  | NA                  | NA      |
| Stage III                       | 5   | 1  | 20  | NA | NA | NA  | NA                  | NA      |
| Stage IV                        | 4   | 2  | 50  | 3  | 2  | 67  | 4.01 (0.36-44.28)   | 0.26    |
| <b>Stomach All</b>              | 9   | 6  | 67  | 15 | 14 | 93  | 5.16 (0.67-39.80)   | 0.12    |
| Stage I                         | 2   | 1  | 50  | 1  | 0  | 0   | 3.66 (0.42-32.09)   | 0.24    |
| Stage II                        | 3   | 1  | 33  | 4  | 4  | 100 |                     |         |
| Stage III                       | 2   | 2  | 100 | 1  | 1  | 100 |                     |         |
| Stage IV                        | 2   | 2  | 100 | 9  | 9  | 100 | NA                  | NA      |
| <b>Thyroid All</b>              | 5   | 0  | 0   | NA | NA | NA  | NA                  | NA      |
| Stage I                         | 3   | 0  | 0   | NA | NA | NA  | NA                  | NA      |
| Stage II                        | 1   | 0  | 0   | NA | NA | NA  | NA                  | NA      |
| Stage IV                        | 1   | 0  | 0   | NA | NA | NA  | NA                  | NA      |
| <b>Urothelial Tract All</b>     | 5   | 3  | 60  | NA | NA | NA  | NA                  | NA      |
| Stage I                         | 1   | 1  | 100 | NA | NA | NA  | NA                  | NA      |
| Stage II                        | 4   | 2  | 50  | NA | NA | NA  | NA                  | NA      |
| <b>Uterus All</b>               | 110 | 25 | 23  | 9  | 6  | 67  | 6.90 (1.72-27.69)   | 0.0065  |
| Stage I                         | 98  | 17 | 17  | 6  | 3  | 50  | 4.76 (1.06-         | 0.041   |

|           |   |   |    |    |    |     |        |    |
|-----------|---|---|----|----|----|-----|--------|----|
| Stage II  | 2 | 1 | 50 | 1  | 1  | 100 | 21.32) |    |
| Stage III | 8 | 6 | 75 | NA | NA | NA  |        |    |
| Stage IV  | 2 | 1 | 50 | 2  | 2  | 100 | NA     | NA |

<sup>a</sup>Other includes brain, mesothelioma, orbit, penis, pleura, skin cancer (not basal cell carcinoma, squamous cell carcinoma, or melanoma), small intestine, testis, thymus, vagina, vulva, and unspecified.  
NA: not applicable; CI: confidence interval.
